# Supplementary material for: TiO2 (Core)/Crumpled Graphene Oxide (Shell) Nanocomposites Show Enhanced Photodegradation of Carbamazepine
Source: MDPI journal article supplement (doi:10.3390/nano11082087), 2021-08-17
Supplement: s1 [file s1]

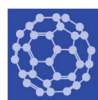

# TiO<sub>2</sub> (Core)/Crumpled Graphene Oxide (Shell) Nanocomposites Show Enhanced Photodegradation of Carbamazepine

Han Fu and Kimberly A. Gray \*

Department of Civil and Environmental Engineering, Northwestern University, 2145 Sheridan Road, Evanston, IL 60208, USA; hanfu2023@u.northwestern.edu (H.F.)

\* Correspondence: k-gray@northwestern.edu (K.G.)

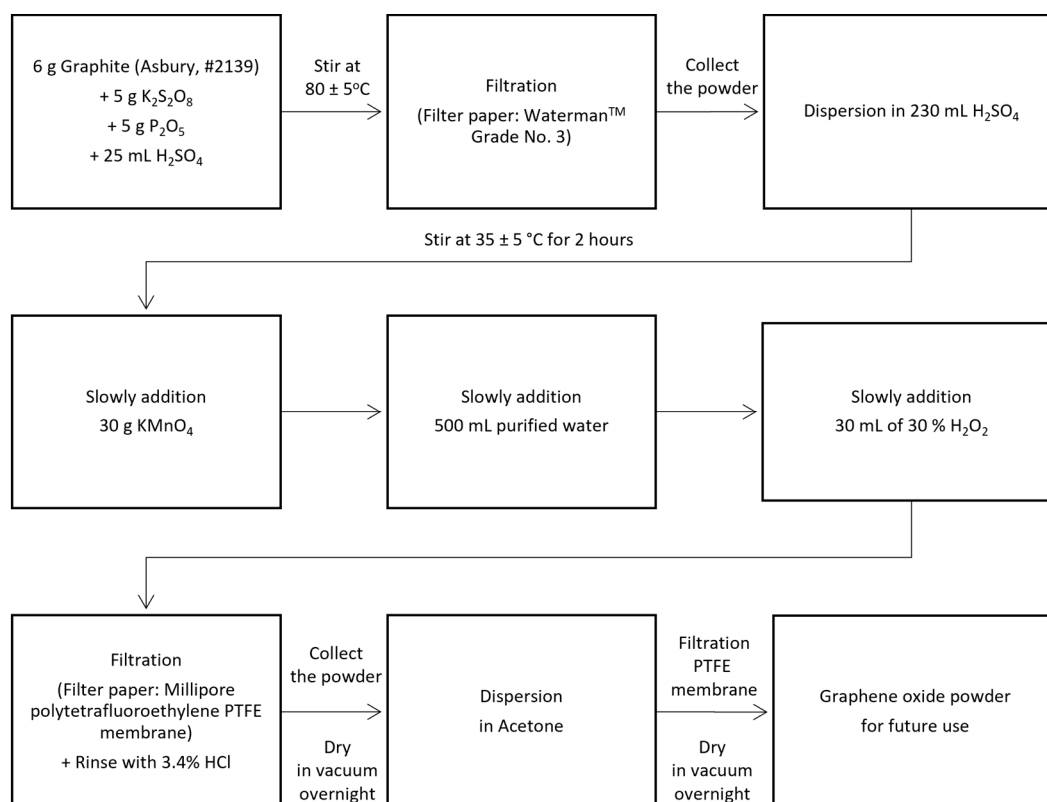

**Figure S1.** Schematic flow chart of graphene oxide synthesis method. All the chemicals were purchased from Sigma-Aldrich, or Fisher Chemical.

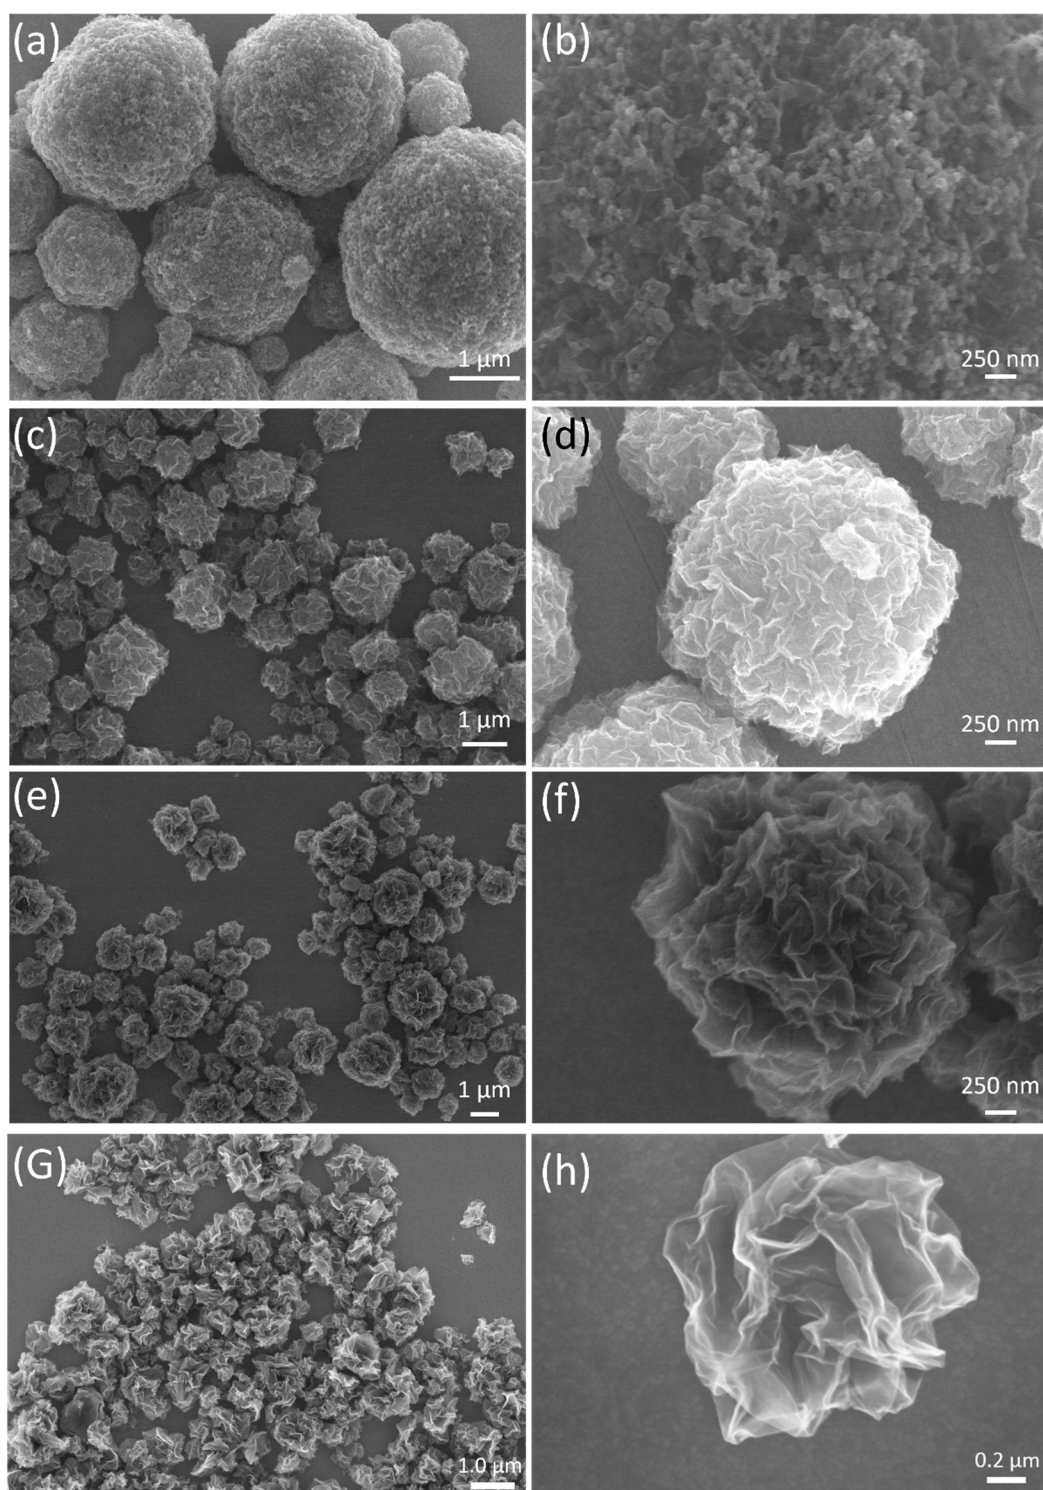

**Figure S2.** SEM images of TiGC with different  $\text{TiO}_2$  and GO weight ratio (a,b)  $\text{TiO}_2$ :GO ratio 10:1 (c,d)  $\text{TiO}_2$ :GO ratio 5:1 (e,f)  $\text{TiO}_2$ :GO ratio 1:1 (g,h) Crumpled graphene ball (CGB, no presence of  $\text{TiO}_2$  during synthesis).

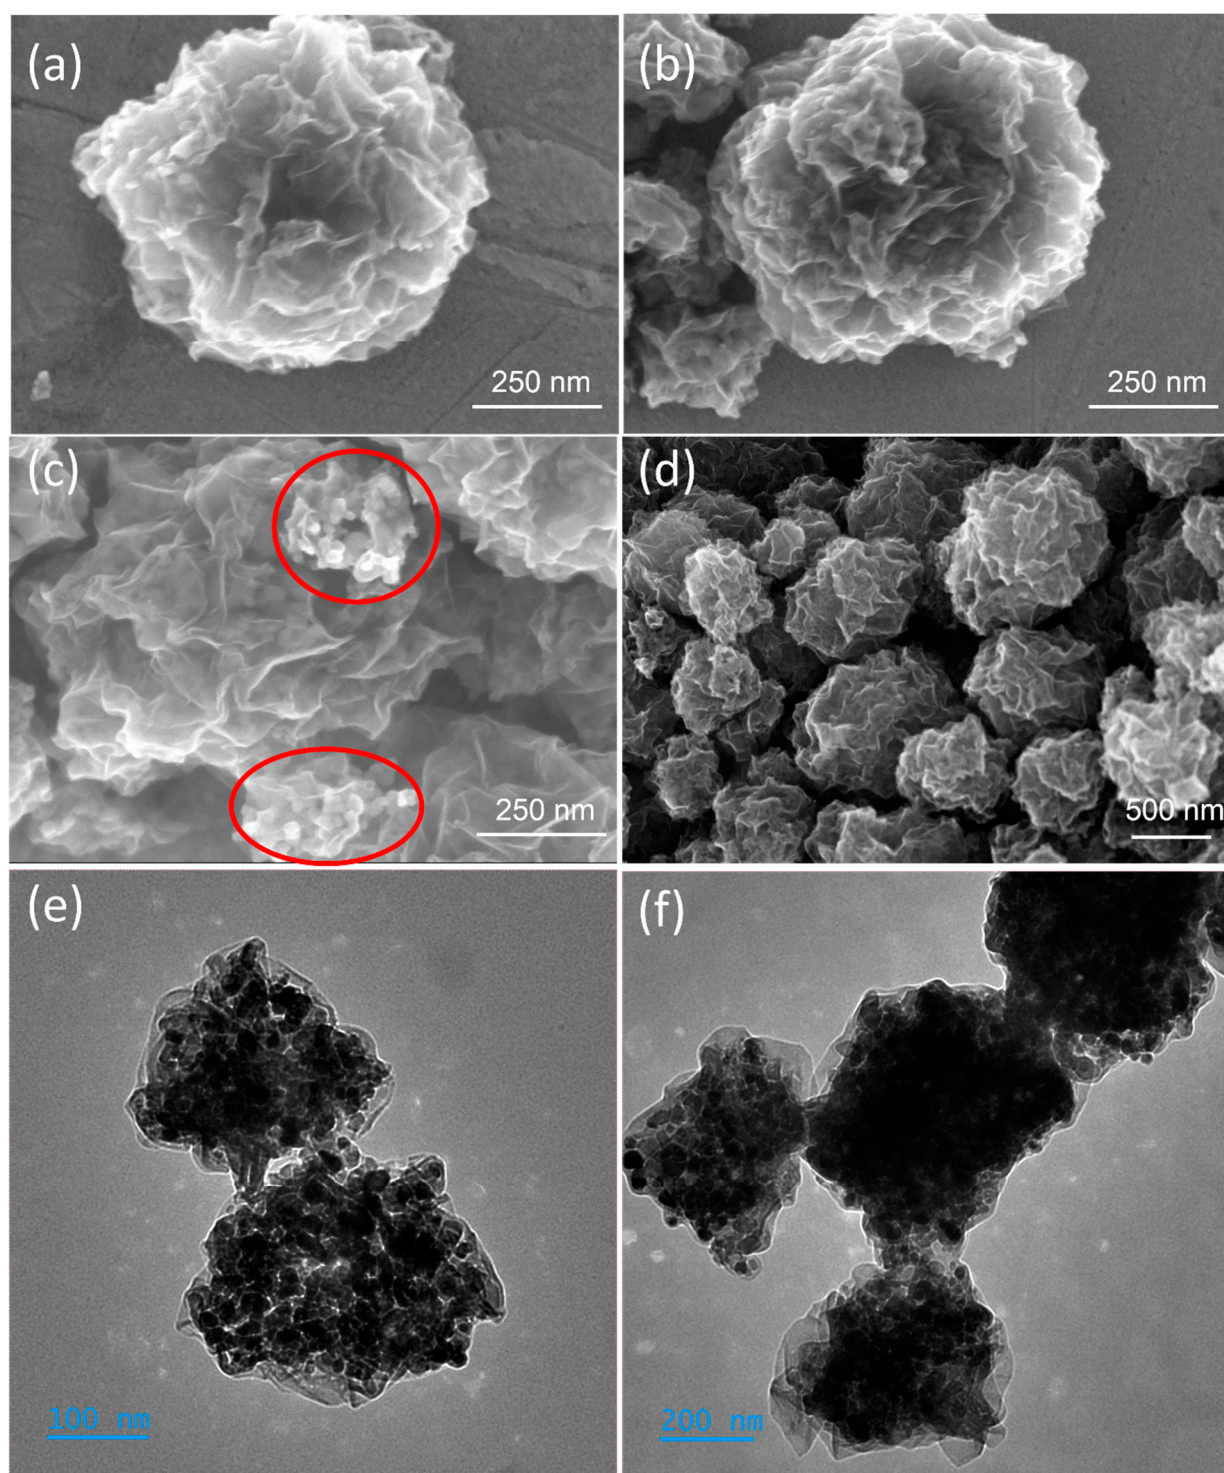

**Figure S3.** (a–d) SEM images and (e,f) TEM images of TiGC (TiO<sub>2</sub>:GO weight ratio 2:1) after photodegradation experiment.

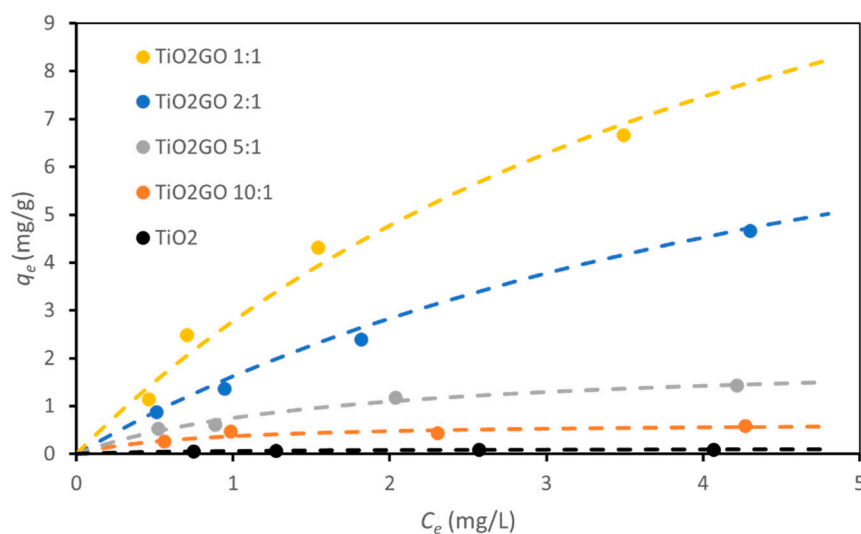

| Name                                   | $q_m(\text{mg/g})$ | $K_L(\text{L/mg})$ | $R^2$  |
|----------------------------------------|--------------------|--------------------|--------|
| TiGC (TiO <sub>2</sub> :GO Ratio 10:1) | 1.25               | 0.67               | 0.9765 |
| TiGC (TiO <sub>2</sub> :GO Ratio 5:1)  | 2.02               | 0.59               | 0.9816 |
| TiGC (TiO <sub>2</sub> :GO Ratio 2:1)  | 11.19              | 0.17               | 0.9965 |
| TiGC (TiO <sub>2</sub> :GO Ratio 1:1)  | 17.12              | 0.19               | 0.9913 |
| TiO <sub>2</sub>                       | 0.12               | 1.04               | 0.9936 |

**Figure S4.** Langmuir adsorption model for carbamazepine adsorption with different TiO<sub>2</sub> and graphene oxide ratios in TiGC.

#### Pseudo first-reaction model

| Name                                   | $k_1(\text{min}^{-1})$ | $R^2$  |
|----------------------------------------|------------------------|--------|
| TiGC (TiO <sub>2</sub> :GO Ratio 10:1) | 0.0269                 | 0.9554 |
| TiGC (TiO <sub>2</sub> :GO Ratio 5:1)  | 0.0326                 | 0.9924 |
| TiGC (TiO <sub>2</sub> :GO Ratio 2:1)  | 0.0286                 | 0.9953 |
| TiGC (TiO <sub>2</sub> :GO Ratio 1:1)  | 0.0177                 | 0.9934 |
| TiO <sub>2</sub>                       | 0.0226                 | 0.9914 |

**Langmuir Hinshelwood model**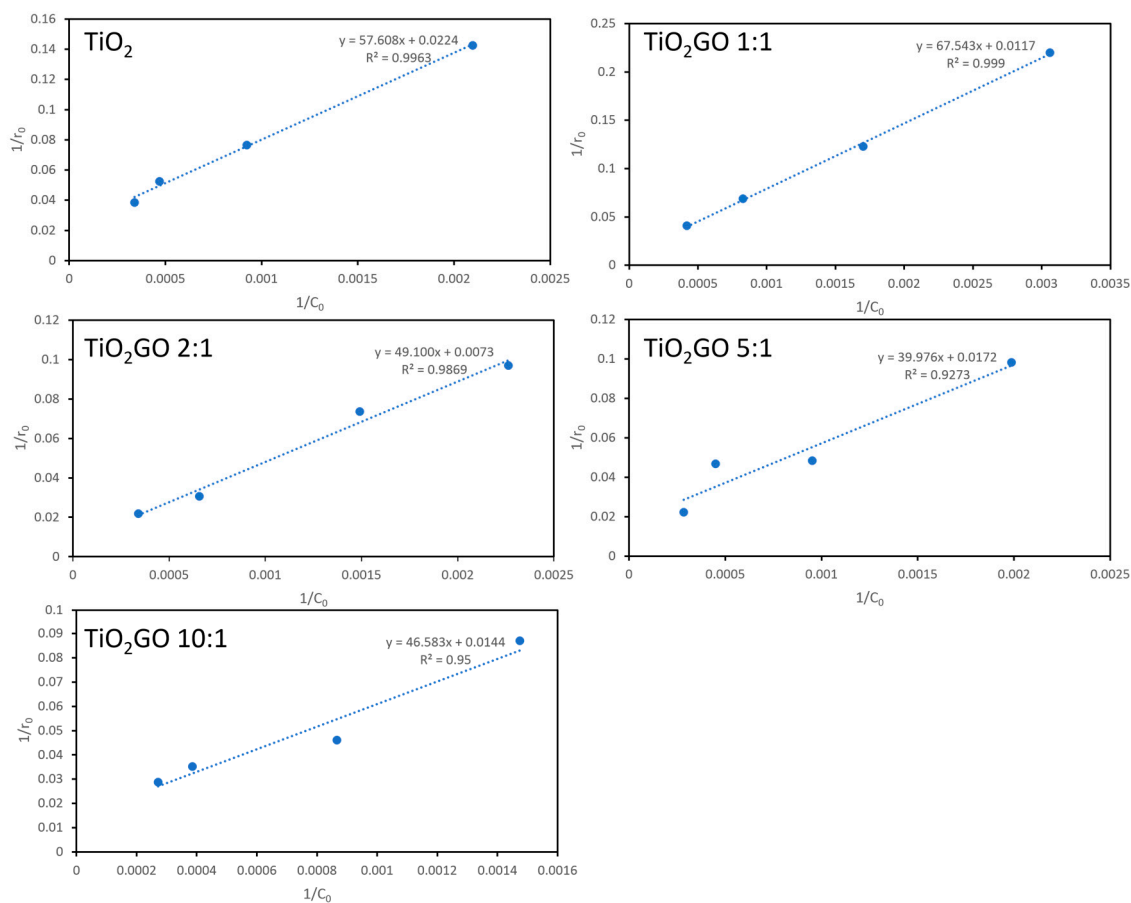

| Name                                   | $k_{L-H}$ ( $\mu\text{g L}^{-1}\text{min}^{-1}$ ) | $K_{L-H}$ ( $\text{L } \mu\text{g}^{-1}$ ) | $R^2$  |
|----------------------------------------|---------------------------------------------------|--------------------------------------------|--------|
| TiGC (TiO <sub>2</sub> :GO Ratio 10:1) | 69.45                                             | 0.00028                                    | 0.9500 |
| TiGC (TiO <sub>2</sub> :GO Ratio 5:1)  | 58.14                                             | 0.00043                                    | 0.9273 |
| TiGC (TiO <sub>2</sub> :GO Ratio 2:1)  | 142.86                                            | 0.00014                                    | 0.9869 |
| TiGC (TiO <sub>2</sub> :GO Ratio 1:1)  | 93.46                                             | 0.00016                                    | 0.9990 |
| TiO <sub>2</sub>                       | 51.67                                             | 0.00046                                    | 0.9963 |

**Figure S5.** Pseudo first-reaction model and Langmuir Hinshelwood model calculation for carbamazepine photodegradation with different TiO<sub>2</sub> and graphene oxide ratios in TiGC.

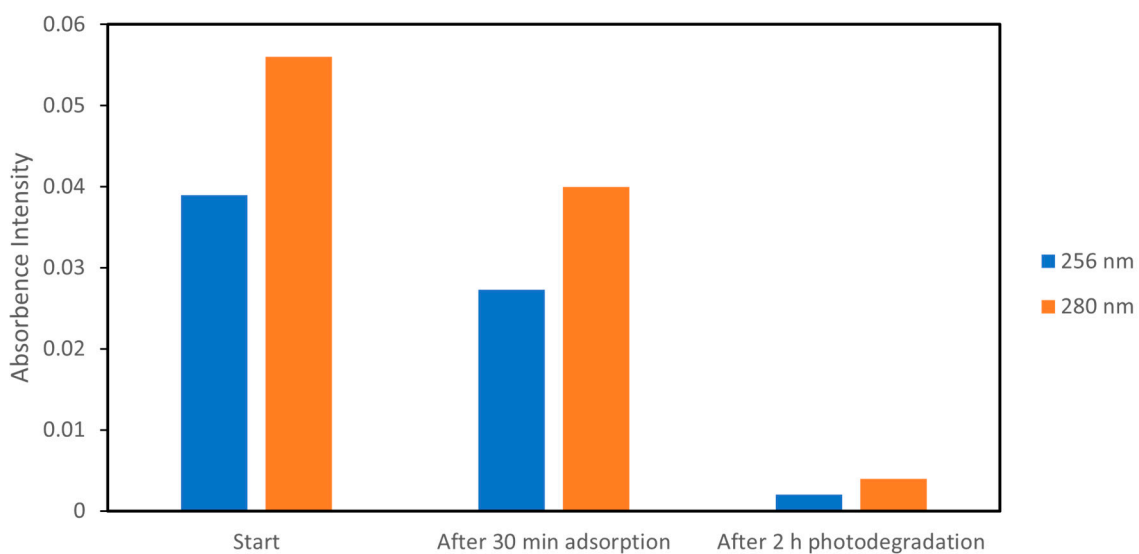

**Figure S6.** UV-vis spectra of two wavelength 256 nm and 280 nm during the photodegradation experiment.

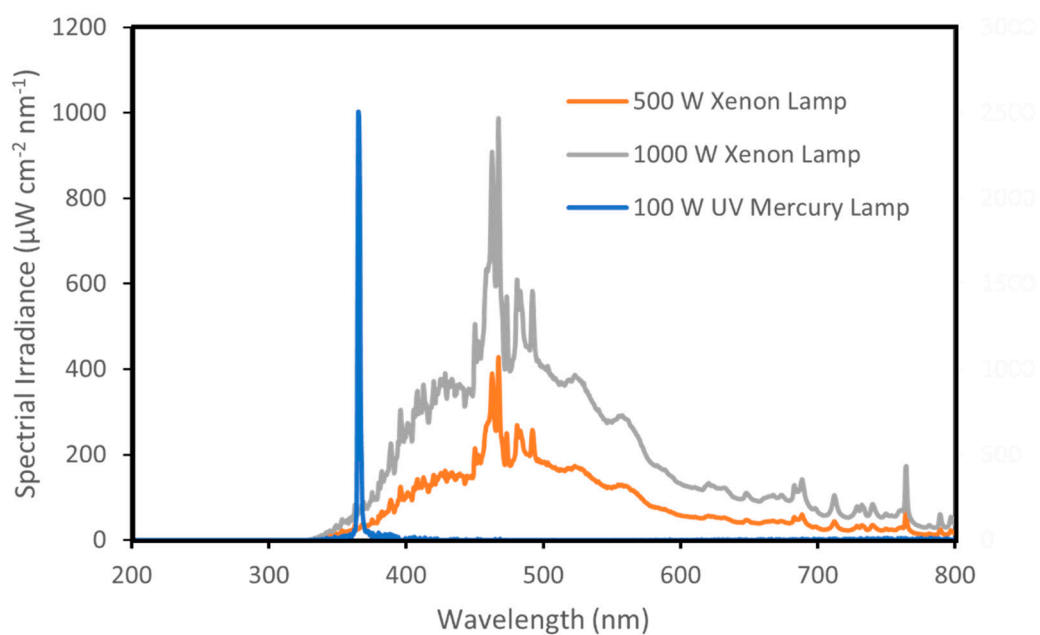

**Figure S7.** Light spectra of simulated solar irradiation from Mercury Lamp (100 W) Xe arc lamp (500 W and 1000 W) under carbamazepine photodegradation tests.



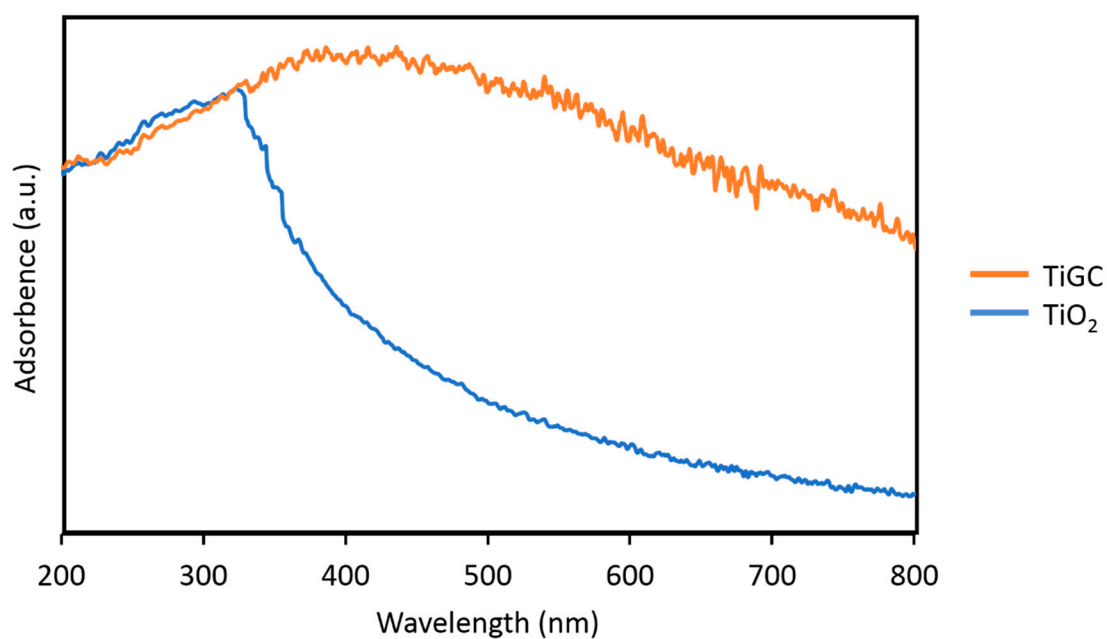

**Figure S8.** UV-vis spectra of TiO<sub>2</sub> P25 and TiGC (TiO<sub>2</sub>:GO ratio 2:1).

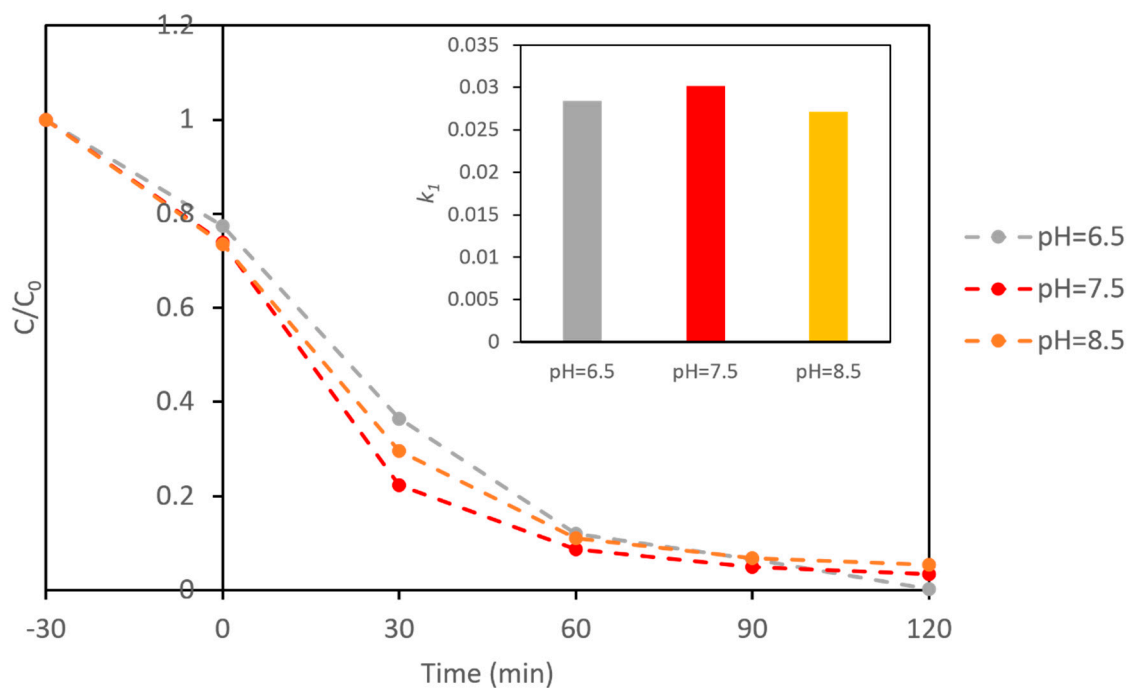

**Figure S9.**  $C/C_0$  Plot for CBZ photodegradation of TiGC (TiO<sub>2</sub>:GO ratio 2:1) and related pseudo first-order reaction constant,  $k_1$  ( $\text{min}^{-1}$ ) at different pH 6.5, 7.5 and 8.5. CBZ initial concentration = 1 mg/L, catalyst dose = 0.2 mg/mL.

| Name                     | $q_m(\text{mg/g})$ | $K_L(\text{L/mg})$ | $R^2$  |
|--------------------------|--------------------|--------------------|--------|
| Control (purified water) | 11.19              | 0.17               | 0.9913 |
| NOM 10 mg/L              | 11.23              | 0.16               | 0.9969 |
| NOM 20 mg/L              | 12.41              | 0.13               | 0.9915 |

**Figure S10.** Langmuir adsorption model for carbamazepine adsorption with TiGC (TiO<sub>2</sub>:GO ratio 2:1) under different NOM concentrations.
